# Supplementary material for: Developing a Comprehensive List of Criteria to Evaluate the Characteristics and Quality of eHealth Smartphone Apps: Systematic Review
Source: PubMed Central journal article supplement (PMC10825776; doi:10.2196/48625), 2024-01-15
Supplement: mhealth_v12i1e48625_app2.pdf [file mhealth_v12i1e48625_app2.pdf]

This is a Multimedia Appendix to a full manuscript published in the J Med Internet Res. For full copyright and citation information see <http://dx.doi.org/10.2196/48625>

## Demographics of participants in the development of the conceptual framework

Table A1. Demographics of volunteers of the public online webinar (n=18).

|                          |                             | N (%)      |
|--------------------------|-----------------------------|------------|
| <b>Role / profession</b> |                             |            |
|                          | Patient representative      | 2 (11.1%)  |
|                          | Researcher                  | 8 (44.4%)  |
|                          | Clinician                   | 3 (16.7%)  |
|                          | Technology developer        | 3 (16.7%)  |
|                          | Missing                     | 2 (11.1%)  |
| <b>Background</b>        |                             |            |
|                          | Nursing                     | 2 (11.1%)  |
|                          | Pharmacy                    | 5 (27.8%)  |
|                          | Psychology                  | 2 (11.1%)  |
|                          | Biology                     | 1 (5.6%)   |
|                          | Medical Sciences            | 1 (5.6%)   |
|                          | Informatics, engineering    | 3 (16.7%)  |
|                          | NA (patient representative) | 2 (11.1%)  |
|                          | Missing                     | 2 (11.1%)  |
| <b>Continent</b>         |                             |            |
|                          | Europe                      | 13 (72.2%) |
|                          | Asia                        | 1 (5.6%)   |
|                          | North America               | 1 (5.6%)   |
|                          | Australia                   | 1 (5.6%)   |
|                          | Missing                     | 2 (11.1%)  |

Table A2. Demographics of NCPC participants (n=34).

|                          |                                              | N (%)      |
|--------------------------|----------------------------------------------|------------|
| <b>Role / profession</b> |                                              |            |
|                          | Researcher                                   | 19 (55.9%) |
|                          | Clinician                                    | 8 (23.5%)  |
|                          | Technology developer                         | 3 (8.8%)   |
|                          | Industry                                     | 3 (8.8%)   |
|                          | Missing                                      | 1 (2.9%)   |
| <b>Background</b>        |                                              |            |
|                          | Nursing                                      | 2 (5.9%)   |
|                          | Pharmacy                                     | 24 (70.6%) |
|                          | Psychology                                   | 1 (2.9%)   |
|                          | Medical Sciences                             | 1 (2.9%)   |
|                          | Informatics, engineering                     | 3 (8.8%)   |
|                          | Communication, policy, international affairs | 3 (8.8%)   |
| <b>Education</b>         |                                              |            |
|                          | PhD                                          | 8 (23.5%)  |
|                          | Master                                       | 11 (32.4%) |
|                          | Master student                               | 12 (35.3%) |
|                          | Bachelor                                     | 3 (8.8%)   |
| <b>Continent</b>         |                                              |            |
|                          | Europe                                       | 30 (88.2%) |
|                          | Asia                                         | 1 (2.9%)   |
|                          | Australia                                    | 1 (2.9%)   |
|                          | Missing                                      | 2 (5.9%)   |
