# Supplementary material for: Developing a Comprehensive List of Criteria to Evaluate the Characteristics and Quality of eHealth Smartphone Apps: Systematic Review
Source: PubMed Central journal article supplement (PMC10825776; doi:10.2196/48625), 2024-01-15
Supplement: mhealth_v12i1e48625_app3.pdf [file mhealth_v12i1e48625_app3.pdf]

This is a Multimedia Appendix to a full manuscript published in the J Med Internet Res. For full copyright and citation information see

<http://dx.doi.org/10.2196/48625>

### Included articles.

Table A3. Summary of included articles (n=128) <sup>a</sup>

| Author, year & country            | Research question / study aim                                                                                                                                                   | Design                                                       | Operating system | Population / condition | Main intervention purpose                     | Tool                                                          | Tool focus                      | Target user of tool          | Framework / theoret. guidance                                                                                                                            | Framework focus                                                                   |
|-----------------------------------|---------------------------------------------------------------------------------------------------------------------------------------------------------------------------------|--------------------------------------------------------------|------------------|------------------------|-----------------------------------------------|---------------------------------------------------------------|---------------------------------|------------------------------|----------------------------------------------------------------------------------------------------------------------------------------------------------|-----------------------------------------------------------------------------------|
| Agnew et al. 2022 UK              | To evaluate the quality of apps related to shoulder pain.                                                                                                                       | Observational cross-sectional study to review available apps | Android & iOS    | Shoulder pain          | NA                                            | Mobile Application Rating Scale (MARS)                        | Quality classification & rating | Researcher                   | NR                                                                                                                                                       | NA                                                                                |
| Ahmed et al. 2020 Canada          | To examine consumers' perceptions of different versions of an app with nutrition information.                                                                                   | Randomized controlled trial                                  | Android & iOS    | Nutrition              | Health information seeking                    | Self-developed criteria                                       | Usability and functionality     | User                         | Multi-dimensional framework for assessing health app quality [1]                                                                                         | Evaluation                                                                        |
| Al Ayubi et al. 2014 USA          | To review characteristics of mHealth for physical activity promotion, to develop an mHealth app that meets such characteristics, and to conduct a feasibility study of the app. | App development and evaluation                               | Android          | Physical Activity      | Health tracking; Social and community support | Fundamental Technical Characteristics; Five Usability Factors | Usability and feasibility       | Developer, researcher & user | Behavior change systems; Heuristic evaluation [2], Technology Acceptance Model (TAM) [3]; Unified Theory of Acceptance and Use of Technology (UTAUT) [4] | Behavior change systems: Development Heuristic evaluation, TAM, UTAUT: Evaluation |
| Alhuwail et al. 2020 Kuwait       | To systematically assess depression and anxiety apps available for Arabic speakers.                                                                                             | Cross-sectional review of existing apps                      | Android & iOS    | Depression & Anxiety   | NA                                            | MARS                                                          | Quality classification & rating | Researcher                   | NR                                                                                                                                                       | NA                                                                                |
| Alnasser et al. 2018 Saudi Arabia | To identify the relationship between adherence to evidence-informed practices, user expectations, and app user experiences.                                                     | App development and evaluation                               | Android & iOS    | Weight loss            | Health tracking                               | System Usability Scale (SUS); Qualitative word clouds         | Usability                       | User                         | NR                                                                                                                                                       | NA                                                                                |
| Amawi et al. 2022 Jordan          | To assess the convenience, quality, safety and efficacy of apps for cancer patient.                                                                                             | Observational cross-sectional study to review available apps | Android & iOS    | Cancer care            | NA                                            | MARS                                                          | Quality classification & rating | Researcher                   | NR                                                                                                                                                       | NA                                                                                |
| Ambrosini et al. 2018 Australia   | To test the acceptability and relative validity of a dietary assessment app.                                                                                                    | Longitudinal user test of an app                             | iOS              | Dietary assessment     | Health tracking                               | Self-developed criteria                                       | Acceptability and usability     | User                         | NR                                                                                                                                                       | NA                                                                                |

|                                       |                                                                                                                                                               |                                                              |               |                                                 |                                                                    |                                                                        |                                                                                                 |                                     |                                                     |             |
|---------------------------------------|---------------------------------------------------------------------------------------------------------------------------------------------------------------|--------------------------------------------------------------|---------------|-------------------------------------------------|--------------------------------------------------------------------|------------------------------------------------------------------------|-------------------------------------------------------------------------------------------------|-------------------------------------|-----------------------------------------------------|-------------|
|                                       |                                                                                                                                                               | (quantitative survey)                                        |               |                                                 |                                                                    |                                                                        |                                                                                                 |                                     |                                                     |             |
| Anderson et al. 2016<br>Australia     | To identify relevant apps for academic evaluation, synthesize a checklist for app quality and reliability, and propose a method for evaluating app usability. | Systematic checklist development                             | Android & iOS | Chronic Diseases                                | NA                                                                 | App Chronic Disease Checklist; MARS                                    | Engagement, functionality, ease of use, information management; Quality rating & classification | Researcher                          | Heuristic evaluation [2]; TAM [3]                   | Development |
| Armenta et al. 2019<br>Mexico & USA   | To understand the interaction of the users with the ActEarly mobile app to improve its usability.                                                             | Cross-sectional user test of an app (mixed-method)           | Android       | Children milestone tracking                     | Health information seeking; Health tracking; Link to health system | Short version SUS; Qualitative think aloud                             | Usability                                                                                       | User                                | NR                                                  | NA          |
| Báez Gutiérrez et al. 2022<br>Spain   | To identify and assess the quality of apps for patients diagnosed with hematological malignancies                                                             | Observational cross-sectional study to review available apps | Android & iOS | Hematologic malignancy                          | NA                                                                 | MARS                                                                   | Quality classification & rating                                                                 | Researcher                          | NR                                                  | NA          |
| Bauer et al. 2018<br>USA              | To describe the design, development, and deployment of a mobile system to support Collaborative Care.                                                         | App development and evaluation                               | Android       | Posttraumat. stress or bipolar disorder         | Health information seeking; Health tracking; Link to health system | SUS; Qualitative open-ended questions                                  | Usability; Usability and functionality                                                          | User & Researcher                   | Principles for digital development [5]              | Development |
| Ben-Mussa et al. 2018<br>UK           | To evaluate the most popular medical apps in the UK for compliance with the Health On the Net (HON) Foundation principles.                                    | Cross-sectional review of existing apps                      | Android & iOS | NA                                              | NA                                                                 | Modified HON Foundation principles                                     | Information quality                                                                             | User                                | HON based on widely accepted ethical principles [6] | Evaluation  |
| Bennion et al. 2019<br>UK             | To evaluate apps that were identified as being used or recommended by the National Health Service.                                                            | Cross-sectional review of existing apps                      | NA            | Mental Health                                   | NA                                                                 | Self-developed criteria                                                | Clinician &, academic involvement, evidence, psychologic approach                               | Developers, National Health Service | NR                                                  | NA          |
| Bentvelsen et al. 2021<br>Netherlands | To obtain an overview and evaluate available apps for prevention of health care-associated infections.                                                        | Scoping review                                               | Android & iOS | Prevention of health care-associated infections | NA                                                                 | MARS; Functionality categories by Institute for Healthcare Informatics | Quality classification & rating; Functionality                                                  | Researcher                          | NR                                                  | NA          |

|                                |                                                                                                                                                      |                                                              |                                       |                                           |                                                              |                                                       |                                                                |                                         |                                                                                                                      |             |
|--------------------------------|------------------------------------------------------------------------------------------------------------------------------------------------------|--------------------------------------------------------------|---------------------------------------|-------------------------------------------|--------------------------------------------------------------|-------------------------------------------------------|----------------------------------------------------------------|-----------------------------------------|----------------------------------------------------------------------------------------------------------------------|-------------|
| Bining et al. 2022<br>Canada   | To evaluate the quality, usefulness, therapeutic potential, and security of publicly available apps to support unpaid cancer caregivers.             | Observational cross-sectional study to review available apps | Android & iOS                         | Cancer caregiver                          | NA                                                           | MARS                                                  | Quality classification & rating                                | Researcher                              | NR                                                                                                                   | NA          |
| Birkhoff et al. 2018<br>USA    | To examine the usability and acceptability of a health tracking app.                                                                                 | Longitudinal user test of an app (mixed-method)              | Android & iOS                         | Oncology patients on radiation treatments | Health tracking; Link to health system                       | Quantitative survey; Qualitative open-ended questions | Usability and usability                                        | User                                    | TAM [3]                                                                                                              | Evaluation  |
| Biviji et al. 2021<br>USA      | To assess user experience, perceived benefits, and general feedback on maternal and infant health apps by analyzing publicly available user reviews. | Observational cross-sectional study to review available apps | Android & iOS                         | Maternal and infant health                | Health information-seeking; Self-management                  | Self-developed questionnaire                          | Content analysis                                               | Researcher                              | NR                                                                                                                   | NA          |
| Bosse et al. 2022<br>USA       | To evaluate the perceived usability of existing and planned features of an app to facilitate opioid use disorder treatment.                          | Cross-sectional user test of an app (mixed-method)           | NA                                    | Opioid use disorder treatment             | Link to health system                                        | Self-developed questionnaire                          | Usefulness, usability, functionality                           | User                                    | User Centered Design [7]                                                                                             | Development |
| Boulos et al. 2014<br>USA & UK | To examine the state of the art in mobile clinical and health-related apps.                                                                          | Scoping Review                                               | Android, Blackberry OS, iOS & Windows | NA                                        | NA                                                           | Happtique Health App Certification Standards          | Information quality, usability, performance, security, privacy | Certification company                   | NR                                                                                                                   | NA          |
| Caballero et al. 2021<br>Spain | To evaluate an app that extracts contextual information from users, returns it to the server, and augments the information in the app.               | App development and evaluation                               | Android                               | Pollen allergy                            | Health information-seeking; Health tracking; Self-management | SUS                                                   | Usability                                                      | User & researcher                       | NR                                                                                                                   | NA          |
| Chan et al. 2015<br>USA        | To propose criteria to assess smartphone, wearable devices and smartwatch apps for mental health.                                                    | Checklist development, not clearly reported                  | Android, Blackberry OS, iOS & Windows | Mental Health                             | NA                                                           | Self-developed criteria                               | Usefulness, usability, infrastructure                          | User and health care professional (HCP) | Usefulness, usability, and infrastructure of software dimensions                                                     | Evaluation  |
| Chang et al. 2020<br>Fiji      | To transform screening tools for depression and suicide risk into app decision support for community nurses, and to evaluate efficiency,             | App development and evaluation                               | NA                                    | Mental Health                             | Self-diagnosis of health conditions                          | SUS                                                   | Usability                                                      | HCP                                     | Center for Epidemiological Studies Depression Scale (CES-D) [8]; Suicide Behaviors Questionnaire-Revised (SBQ-R) [9] | Development |

|                                         |                                                                                                                                       |                                                                                    |                        |                                                            |                                                                 |                                                                                                 |                                                |                       |                                          |                                       |
|-----------------------------------------|---------------------------------------------------------------------------------------------------------------------------------------|------------------------------------------------------------------------------------|------------------------|------------------------------------------------------------|-----------------------------------------------------------------|-------------------------------------------------------------------------------------------------|------------------------------------------------|-----------------------|------------------------------------------|---------------------------------------|
|                                         | effectiveness, and usability.                                                                                                         |                                                                                    |                        |                                                            |                                                                 |                                                                                                 |                                                |                       |                                          |                                       |
| Chirambo et al. 2021 Malawi             | To explore end users perspectives of two already implemented decision support tools for community case management in Northern Malawi. | Mixed-methods study (survey and individual interviews)                             | Android                | Access to health care services in marginalized communities | Health information-seeking; Self-diagnosis of health conditions | MARS                                                                                            | Quality classification & rating                | HCP                   | (MARS)                                   | Evaluation                            |
| Choi et al. 2018 USA                    | To identify and assess the functionalities of available apps to support sleep self-management.                                        | Cross-sectional review of existing apps                                            | Android, iOS & Windows | Sleep                                                      | NA                                                              | MARS; IMS Institute for Healthcare Informatics functionality scores                             | Quality classification & rating; Functionality | Researcher            | NR                                       | NA                                    |
| Collins 2019 USA                        | To explore nurses' willingness to adopt secure apps and their perception of ease of use.                                              | Cross-sectional survey                                                             | NA                     | NA                                                         | NA                                                              | Intention to Use survey                                                                         | Intention to use                               | HCP                   | TAM [3]                                  | Evaluation                            |
| Cruz Zapata et al. 2018 Spain & Morocco | To propose a software requirement catalogue for the development or evaluation of mHealth apps.                                        | Catalogue development by SIREN (Simple REuse of software requiremeNts) methodology | NA                     | NA                                                         | NA                                                              | Usability on mobile health applications-specifications                                          | Usability                                      | Developer and auditor | ISO/IEC/IEEE 29148:2011 [10]; SIREN [11] | SIREN: Development<br>ISO: Evaluation |
| Davalbhakta et al. 2020 India           | To provide an overview of mobile apps around COVID-19 and an assessment of their functions and quality.                               | Systematic Review                                                                  | NA                     | COVID-19                                                   | NA                                                              | MARS                                                                                            | Quality classification & rating                | Researcher            | NR                                       | NA                                    |
| Davis et al. 2017 USA                   | To critique existing apps using criteria and health literacy guidelines.                                                              | Cross-sectional review of existing apps                                            | iOS                    | Parenting                                                  | NA                                                              | Patient Education Materials Assessment Tool                                                     | Information quality                            | Researcher            | NR                                       | NA                                    |
| Dubov et al. 2021 USA                   | To test feasibility, usability, user engagement and satisfaction of an evidence-informed suicide prevention app.                      | Qualitative interviews and focus groups                                            | NA                     | Suicide prevention among transgender persons               | Health tracking; Self-management                                | Interview guide adapted from SUS and Standardized User Experience Percentile Rank Questionnaire | Usability; User experience                     | User                  | Meyer Minority Stress framework [12]     | Development                           |
| Dunn Lopez et al. 2021 USA              | To determine readability, types of functions, and linkage to authoritative sources of evidence for self-care                          | Observational cross-sectional study to review available apps                       | Android & iOS          | Heart failure patients                                     | NA                                                              | Self-developed questionnaire                                                                    | Readability, functionality, evidence base      | Researcher            | TAM                                      | Evaluation                            |

|                                             |                                                                                                                                     |                                                              |                        |                                                 |                                                              |                                                                                                                  |                                                                   |                   |                                                                                                                                     |            |
|---------------------------------------------|-------------------------------------------------------------------------------------------------------------------------------------|--------------------------------------------------------------|------------------------|-------------------------------------------------|--------------------------------------------------------------|------------------------------------------------------------------------------------------------------------------|-------------------------------------------------------------------|-------------------|-------------------------------------------------------------------------------------------------------------------------------------|------------|
|                                             | focused apps for heart failure patients.                                                                                            |                                                              |                        |                                                 |                                                              |                                                                                                                  |                                                                   |                   |                                                                                                                                     |            |
| East-Richard et al. 2018<br>Canada          | To assess evaluative mobile apps in psychology and neuropsychology.                                                                 | Cross-sectional review of existing apps                      | Android, iOS & Windows | Psychological or neuro-psychological assessment | NA                                                           | Adapted Ordre des conseillers/ères d'orientation et des psychoéducateurs/rices du Québec (OCCOPPQ) questionnaire | Usability, accuracy, information quality                          | Researcher        | Testing standards of practice (OCCOPPQ) and standards for mobile device interfaces [13]; Operating system design guidelines [14-16] | Evaluation |
| Egan et al. 2022<br>UK                      | To test feasibility, acceptability and usability of a digital health app for caregivers to improve physical activity.               | Longitudinal user test of an app (mixed-method)              | Android                | Physical activity in caregivers                 | Health information-seeking; Self-management                  | Self-developed questionnaire                                                                                     | Feasibility, usability, acceptability                             | User              | Transtheoretical model of behavior change [17]; extended UTAUT (UTAUT2) [18]                                                        | Evaluation |
| Ehrler et al. 2018<br>Switzerland           | To assess the usability of the BEDSide Mobility app to support nursing workflow.                                                    | Cross-sectional user test of an app (mixed-method)           | Android                | NA                                              | Health tracking; Link to health system                       | SUS; Qualitative think aloud & eye-tracking                                                                      | Usability                                                         | HCP               | NR                                                                                                                                  | NA         |
| Eisner et al. 2019<br>UK                    | To develop an app for monitoring early signs, basic and psychotic symptoms; and qualitatively evaluate its long-term acceptability. | App development and evaluation                               | NA                     | Psychosis relapse                               | Health tracking                                              | Self-developed criteria                                                                                          | Acceptability                                                     | User              | NR                                                                                                                                  | NA         |
| Fijacko et al. 2021<br>Slovenia             | To evaluate the quality of apps that include mortality prediction models.                                                           | Observational cross-sectional study to review available apps | Android & iOS          | Mortality risk prediction                       | Self-diagnosis of health conditions                          | uMARS                                                                                                            | Engagement, functionality, aesthetics, information quality        | HCP               | NR                                                                                                                                  | NA         |
| Forman et al. 2019<br>USA                   | To evaluate the feasibility, acceptability, and preliminary effectiveness of a weight loss app.                                     | Longitudinal user test of an app (quantitative survey)       | iOS                    | Dietary lapses                                  | Health tracking; Self-management                             | Technology Acceptance Model Scale                                                                                | Satisfaction, perceived usefulness, usability, technical problems | User              | TAM [3]                                                                                                                             | Evaluation |
| Fuller-Tyszkiewicz et al. 2018<br>Australia | To evaluate usability of a personalized, self-guided, app-based intervention for depression.                                        | Longitudinal user test of an app (mixed-method)              | NA                     | Depression                                      | Health information seeking; Health tracking; Self-management | SUS; Qualitative open-ended questions                                                                            | Usability                                                         | User & researcher | NR                                                                                                                                  | NA         |

|                                            |                                                                                                                                                  |                                                              |                                       |                                          |                                                   |                                                                 |                                                                        |                    |                                                                                                                   |             |
|--------------------------------------------|--------------------------------------------------------------------------------------------------------------------------------------------------|--------------------------------------------------------------|---------------------------------------|------------------------------------------|---------------------------------------------------|-----------------------------------------------------------------|------------------------------------------------------------------------|--------------------|-------------------------------------------------------------------------------------------------------------------|-------------|
| Gartenberg et al. 2013<br>USA              | To describe the development of an app for insomnia treatment that is easy to use and has a high perceived benefit.                               | App development and evaluation                               | iOS                                   | Insomnia and sleep-related problems      | Health tracking; Self-management                  | Hierarchical Task Analysis, User satisfaction evaluation survey | Problem identification                                                 | Developer & user   | Goals, Operators, Methods, and Selection rules (GOMS) modeling method [19]; Cognitive Behavior Therapy (CBT) [20] | Evaluation  |
| Goetz et al. 2017<br>Germany               | To analyze perceptions and requirements for pregnancy apps from patients' perspective and their impact on daily clinical routine.                | Qualitative interviews                                       | NA                                    | Pregnancy                                | NA                                                | Self-developed criteria                                         | Usability, acceptability, impact on HCP-patient interaction            | User               | NR                                                                                                                | NA          |
| Gomes et al. 2022<br>Portugal              | To present the results of performed usability tests for both web and mobile software applications of the Help2Care platform to train caregivers. | Cross-sectional user test of an app (mixed-method)           | NA                                    | Caregiver training                       | Health information-seeking; Link to health system | Self-developed questionnaire                                    | Usability, suggestions for improvement                                 | User               | NR                                                                                                                | NA          |
| Gorini et al. 2018<br>Italy                | To analyze variables that influence mHealth acceptance / adoption and to promote guidelines for future resources and apps.                       | Approach development, not clearly reported                   | Android, Blackberry OS, iOS & Windows | Chronic conditions                       | NA                                                | P5 mHealth approach                                             | Supporting innovative and personalized ways to improve quality of care | Developer          | P5 medicine [21]                                                                                                  | Development |
| Grau et al. 2016<br>Spain                  | To develop a tool for evaluating the reliability of health apps.                                                                                 | Review & Delphi survey                                       | Android & iOS                         | NA                                       | NA                                                | iSYScore                                                        | Popularity & interest, trust & quality, useful                         | User               | NR                                                                                                                | NA          |
| Groen et al. 2022<br>Zambia & South Africa | To describe the development and feasibility assessment of a mobile screening application for detecting mental disorders among adolescents.       | App development and evaluation                               | Android                               | Mental health problems among adolescents | Health information-seeking                        | MARS                                                            | Quality classification & rating                                        | HCP                | Areas of focus for feasibility studies [22]                                                                       | Evaluation  |
| Guan et al. 2019<br>China                  | To develop a reliable framework to assess content and behavior change strategies of asthma apps.                                                 | Review & Delphi survey                                       | NA                                    | Asthma                                   | Individual agency; Health information-seeking     | Asthma apps assessment                                          | Information quality, behavior change strategies, design                | HCP and researcher | Asthma apps assessment framework [23]                                                                             | Evaluation  |
| Hammond et al. 2021<br>Australia           | To identify psychoeducational social anxiety apps, report descriptive and technical                                                              | Observational cross-sectional study to review available apps | Android & iOS                         | People with social anxiety               | NA                                                | MARS                                                            | Quality classification & rating                                        | Researcher         | NR                                                                                                                | NA          |

|                               |                                                                                                                                  |                                                              |                        |                                  |                                                                |                                       |                                                 |                       |                                                                                                                                       |            |
|-------------------------------|----------------------------------------------------------------------------------------------------------------------------------|--------------------------------------------------------------|------------------------|----------------------------------|----------------------------------------------------------------|---------------------------------------|-------------------------------------------------|-----------------------|---------------------------------------------------------------------------------------------------------------------------------------|------------|
|                               | information and evaluate app quality.                                                                                            |                                                              |                        |                                  |                                                                |                                       |                                                 |                       |                                                                                                                                       |            |
| Hampton et al. 2020 UK        | To assessed the usability of a dermatology app.                                                                                  | Longitudinal user test of an app (quantitative survey)       | Android & iOS          | Skin                             | Health tracking                                                | Self-developed criteria               | Usability                                       | User                  | NR                                                                                                                                    | NA         |
| Hartzler et al. 2016 USA      | To assess the acceptability, usability and utility of a self-developed app to guide design considerations.                       | App development and evaluation                               | iOS                    | Diabetes mellitus and depression | Social and community support; Health tracking; Self-management | SUS; Qualitative open-ended questions | Usability; Intention to use                     | User                  | NR                                                                                                                                    | NA         |
| Hsieh et al. 2018 USA         | To develop a fall risk app and to determine its usability in healthy, older adults.                                              | App development and evaluation                               | Android                | Fall risk in health older adults | Self-diagnosis of health conditions                            | SUS; Qualitative open-ended questions | Usability                                       | User                  | NR                                                                                                                                    | NA         |
| Islam et al. 2022 Australia   | To systematically review and evaluate high-quality apps for diabetes medication adherence, and present their technical features. | Observational cross-sectional study to review available apps | Android & iOS          | Diabetes medication adherence    | NA                                                             | MARS                                  | Quality classification & rating                 | Researcher            | NR                                                                                                                                    | NA         |
| Jain et al. 2019 India        | To develop an educational mobile app and pilot test in an Indian clinical setting.                                               | App development and evaluation                               | Android                | Heart patients                   | Health information-seeking                                     | MARS; User satisfaction questionnaire | Quality classification & rating; Satisfaction   | User, HCP & developer | NR                                                                                                                                    | NA         |
| Jeffrey et al. 2019 Australia | To evaluate the experiences, barriers and facilitators to app usage and determine recommendations to improve app use.            | Qualitative interviews                                       | Android & iOS          | Type 2 Diabetes                  | NA                                                             | Qualitative interview guide           | Ease of use, usefulness, acceptance, aesthetics | User                  | TAM [3]; Factors Influencing App Use (modified from Health Belief model & Health Information Technology Acceptance Model, HITAM) [24] | Evaluation |
| Jeon et al. 2016 South Korea  | To develop and evaluate four apps that provide tailored nursing recommendations for metabolic syndrome management.               | App development and evaluation                               | Android, iOS & Windows | Metabolic syndrom                | Social and community support; Health tracking; Self-management | SUS; System Usability Questionnaire   | Usability                                       | Expert                | NR                                                                                                                                    | NA         |
| Jiam et al. 2017 USA          | To describe the development of an app used to communicate                                                                        | App development and evaluation                               | iOS                    | Neuro-developmental disabilities | Peronal health tracking; Self-management;                      | Self-developed criteria               | User interface, experience                      | NR                    | NR                                                                                                                                    | NA         |

|                                               |                                                                                                                                                                                 |                                                              |                        |                                                |                                                                          |                                                                                            |                                                                         |                    |                                                                                |            |
|-----------------------------------------------|---------------------------------------------------------------------------------------------------------------------------------------------------------------------------------|--------------------------------------------------------------|------------------------|------------------------------------------------|--------------------------------------------------------------------------|--------------------------------------------------------------------------------------------|-------------------------------------------------------------------------|--------------------|--------------------------------------------------------------------------------|------------|
|                                               | and organize health care information.                                                                                                                                           |                                                              |                        |                                                | Link to health system                                                    |                                                                                            |                                                                         |                    |                                                                                |            |
| Jiang et al. 2022<br>China                    | To design and develop an app to provide remote Warfarin dose adjustment and to evaluate its usability                                                                           | App development and evaluation                               | WeChat                 | Warfarin dose adjustment                       | Health information seeking;<br>Self-management;<br>Link to health system | SUS                                                                                        | Usability                                                               | User & HCP         | NR                                                                             | NA         |
| Jin & Kim 2015<br>South Korea                 | To develop and evaluate an evaluation tool for health apps.                                                                                                                     | App development and evaluation                               | NA                     | NA                                             | NA                                                                       | Healthcare Smartphone Applications Rating Tool                                             | Validity, reliability                                                   | User               | Three types of evaluation factors (content, technology, interface design) [25] | Evaluation |
| Johnson et al. 2016<br>USA                    | To evaluate the extent of coverage, ease of use, and quality across mobile devices and operating systems of six selected mobile point-of-care tools.                            | App development and evaluation                               | Android & iOS          | NA                                             | Health information seeking                                               | Criteria based on Healthcare Information and Management Systems Society and Nielsen (2011) | Breadth of coverage, quality of evidence, usability of design           | HCP                | International Classification of Diseases, Ninth Revision (ICD-9)               | Evaluation |
| Jovičić et al. 2019<br>Serbia, Poland & Italy | To review and evaluate existing apps to manage laboratory medicine data.                                                                                                        | Cross-sectional review of existing apps                      | Android, iOS & Windows | Management of laboratory medicine data         | NA                                                                       | MARS                                                                                       | Quality classification & rating                                         | Researcher         | NR                                                                             | NA         |
| Kabir et al. 2021<br>Australia                | To assess the method and software quality of foot measurement apps, and to determine their potential for use in clinical practice.                                              | Observational cross-sectional study to review available apps | Android & iOS          | Foot measurement in pedorthic                  | NA                                                                       | FootMARS                                                                                   | Usability, reliability, functionality, efficiency                       | Software developer | NR                                                                             | NA         |
| Kaliyadan et al. 2020<br>Saudi Arabia & India | To discuss categories and scientific validity of dermatology apps.                                                                                                              | Cross-sectional review of existing apps                      | Android, iOS & Windows | Dermatology                                    | NA                                                                       | Unclear origin of the criteria used                                                        | App selection criteria                                                  | HCP                | NR                                                                             | NA         |
| Karsalia & Malik 2022<br>USA                  | To evaluate the quality apps for pelvic organ prolapse and urinary incontinence, analyze user sentiment, and evaluate information understandability, quality and actionability. | Observational cross-sectional study to review available apps | Android & iOS          | Pelvic organ prolapse and urinary incontinence | NA                                                                       | Xcertia guidelines; DISCERN tool; Patient Education Materials Assessment Tool (PEMAT)      | Operability, privacy, security, content, usability; Information quality | Researcher         | NR                                                                             | NA         |



|                                  |                                                                                                                                                                                        |                                                                      |                        |                                                                 |                                                                    |                                                             |                                                                           |                             |                                                                  |             |
|----------------------------------|----------------------------------------------------------------------------------------------------------------------------------------------------------------------------------------|----------------------------------------------------------------------|------------------------|-----------------------------------------------------------------|--------------------------------------------------------------------|-------------------------------------------------------------|---------------------------------------------------------------------------|-----------------------------|------------------------------------------------------------------|-------------|
| Karasneh et al. 2020<br>Jordan   | To identify and evaluate apps related to period tracking.                                                                                                                              | Systematic review                                                    | Android & iOS          | Period tracking                                                 | NA                                                                 | MARS                                                        | Quality classification & rating                                           | Researcher                  | NR                                                               | NA          |
| Kettlewell et al. 2018<br>UK     | To explore barriers and enablers for the uptake and use of an app in clinical practice, identify potential adaptations, and evaluate a model for engagement.                           | Mixed-methods study (quantitative surveys, qualitative focus groups) | NA                     | Brain injury                                                    | Health tracking; Self-management; Link to health system            | MARS; SUS                                                   | Quality classification & rating; Usability                                | All stakeholder             | Behavior Change Wheel (BCW) [26]                                 | Development |
| Knitza et al. 2019<br>Germany    | To provide an overview of rheumatology apps, evaluate quality and describe for patients and rheumatologists.                                                                           | Cross-sectional review of existing apps                              | Android & iOS          | Chronic rheumatic diseases                                      | NA                                                                 | MARS                                                        | Quality classification & rating                                           | Researcher, developer & HCP | NR                                                               | NA          |
| Kwan et al. 2017<br>Canada       | To discuss ethical issues, risks and benefits when implementing health-monitoring apps in clinical practice; and to provide guidance on health-monitoring apps.                        | Scoping Review                                                       | NA                     | Mental Health                                                   | Health tracking; Link to health system                             | Summary of ethical recommendations                          | Guide ethical decision-making process                                     | HCP                         | Canadian Code of Ethics for Psychologists [27]                   | Evaluation  |
| Lagan et al. 2020<br>USA         | To evaluate the most accessible apps for bipolar disorder.                                                                                                                             | Cross-sectional review of existing apps                              | iOS                    | Bipolar disorders                                               | NA                                                                 | Self-developed criteria                                     | Accessibility, privacy, clinical foundation, engagement, interoperability | Researcher                  | American Psychiatric Association's App Evaluation Framework [28] | Evaluation  |
| Laloo et al. 2017<br>Canada      | To characterize and evaluate the content and functionality of commercial pain self-management apps.                                                                                    | Cross-sectional review of existing apps                              | Android, iOS & Windows | Postoperative Pain                                              | NA                                                                 | Self-developed criteria                                     | Content, HCP involvement, scientific research                             | Researcher                  | NR                                                               | NA          |
| Langarizadeh et al. 2022<br>Iran | To design and evaluate a mobile-based nutrition education application for infertile women.                                                                                             | App development and evaluation                                       | Android                | Nutrition for infertile women                                   | Health information-seeking                                         | Questionnaire for User Interaction Satisfaction (QUIS) [29] | Usability                                                                 | User                        | NR                                                               | NA          |
| Lao et al. 2022<br>China         | To understand usability and satisfaction of an app to improve cardiovascular risk factors and effects of cardiac rehabilitation for patients after percutaneous coronary intervention. | Longitudinal user test of an app (qualitative interviews)            | NA                     | Cardiac rehabilitation after percutaneous coronary intervention | Health information-seeking; Health tracking; Link to health system | Self-developed questionnaire                                | User experience                                                           | User                        | Social Cognitive Theory [30]                                     | Development |

|                                    |                                                                                                                                                                          |                                                              |               |                                                  |                                                                          |                                                                      |                                  |            |                                                    |            |
|------------------------------------|--------------------------------------------------------------------------------------------------------------------------------------------------------------------------|--------------------------------------------------------------|---------------|--------------------------------------------------|--------------------------------------------------------------------------|----------------------------------------------------------------------|----------------------------------|------------|----------------------------------------------------|------------|
| Lau et al. 2021<br>USA             | To evaluate the quality of successful apps, and the relationships between objective app quality, subjective user ratings, and evidence-based behavior change techniques. | Observational cross-sectional study to review available apps | Android & iOS | Mental health                                    | NA                                                                       | MARS                                                                 | Quality classification & rating  | Researcher | NR                                                 | NA         |
| Le Marne et al. 2018<br>Australia  | To evaluate a newly developed app to educate and facilitate management of adolescents with epilepsy.                                                                     | Longitudinal user test of an app (mixed-method)              | Android & iOS | Adolescents with Epilepsy                        | Health information-seeking;<br>Health tracking;<br>Link to health system | MARS                                                                 | Quality classification & rating  | User       | NR                                                 | NA         |
| Li et al. 2020<br>China            | To evaluate postpartum depression apps available in China.                                                                                                               | Cross-sectional review of existing apps                      | Android & iOS | Postpartum depression                            | NA                                                                       | MARS                                                                 | Quality classification & rating  | Researcher | NR                                                 | NA         |
| Logsdon et al. 2019<br>USA         | To develop an app prototype to increase a new mother's ability to monitor her own health.                                                                                | App development and evaluation                               | NA            | Mothers after childbirth                         | Health information-seeking;<br>Health tracking                           | MARS                                                                 | Quality classification & rating  | User       | NR                                                 | NA         |
| Lorca-Cabrera et al. 2021<br>Spain | To analyze the technical and functional characteristics of apps for caregivers of chronically ill.                                                                       | Observational cross-sectional study to review available apps | Android & iOS | Caregivers of patients with chronic conditions   | NA                                                                       | Self-developed questionnaire                                         | Technical aspects, functionality | Researcher | NR                                                 | NA         |
| Manning et al. 2021<br>Australia   | To test feasibility, acceptability, and effectiveness of an alcohol avoidance app, and explore alcohol consumption and craving.                                          | Longitudinal user test of an app (quantitative survey)       | Android & iOS | Alcohol consumption at hazardous levels or above | Individual agency                                                        | uMARS                                                                | Acceptability                    | User       | NR                                                 | NA         |
| Mansson et al. 2020<br>Sweden      | To develop a self-test app for balance and leg strength in older adults.                                                                                                 | App development and evaluation                               | Android       | Balance and leg strength in older adults         | Self-diagnosis of health conditions                                      | Qualitative think aloud & group discussions (used questions unclear) | User experience                  | Developer  | Optimized Honeycomb model for user experience [31] | Evaluation |

|                                  |                                                                                                                                                                      |                                                              |                                       |                                                                                                |                                                              |                                                                                                                                                |                                                                                           |                        |                                                          |            |
|----------------------------------|----------------------------------------------------------------------------------------------------------------------------------------------------------------------|--------------------------------------------------------------|---------------------------------------|------------------------------------------------------------------------------------------------|--------------------------------------------------------------|------------------------------------------------------------------------------------------------------------------------------------------------|-------------------------------------------------------------------------------------------|------------------------|----------------------------------------------------------|------------|
| Maramba et al. 2019 UK           | To identify, explore, and summarize the current methods used in the usability testing of eHealth apps.                                                               | Scoping Review                                               | NA                                    | Mental health, cancer, nutrition, child health, diabetes, cardiovascular disease, HIV, smoking | NA                                                           | SUS; System Usability Questionnaire; TAM Questionnaire; Task Index; AdEQUATE (questionnaire for Evaluation of QUALity in TElemedicine systems) | Usability                                                                                 | User & HCP             | NR                                                       | NA         |
| Martinengo et al 2022 Singapore  | To systematically evaluate adherence to clinical guidelines on depression of the information offered by mental health apps available in major commercial app stores. | Observational cross-sectional study to review available apps | Android & iOS                         | Mental health                                                                                  | Health information-seeking                                   | Self-developed questionnaire                                                                                                                   | Content analysis, technical aspects                                                       | Researcher             | NR                                                       | NA         |
| Martinez-Perez et al. 2013 Spain | To develop a tool to assess the Quality of Experience of mHealth apps to improve the quality of existing and new apps.                                               | Systematic checklist development                             | Android, Blackberry OS & iOS          | NA                                                                                             | NA                                                           | Quality of Experience survey                                                                                                                   | User experience                                                                           | Developer              | NR                                                       | NA         |
| Martinez-Perez et al. 2015 Spain | To compare two different tools for assessing the quality of the Heartkeeper mHealth app for self-management of heart diseases.                                       | Cross-sectional review of existing apps                      | Android                               | Heart diseases and conditions                                                                  | Health information-seeking; Health tracking; Self-management | Quality of Experience survey; Android guidelines by Google                                                                                     | User experience                                                                           | Developer              | NR                                                       | NA         |
| McKay et al. 2018 Australia      | To investigate current best practice approaches for health app evaluation.                                                                                           | Systematic Review                                            | Android, Blackberry OS, iOS & Windows | Health behavior change                                                                         | NA                                                           | MARS; Coventry, Aberdeen & London-Revised taxonomy (CALO-RE); Flesch-Kincaid Grade Level readability formula                                   | Quality classification & rating; Taxonomy of behavior change techniques; Content analysis | NR                     | Heuristic evaluation [2]; Behaviour change taxonomy [32] | Evaluation |
| McKay et al. 2019 Australia      | To review and test healthy lifestyle apps in view of functionality and                                                                                               | Cross-sectional review of existing apps                      | iOS                                   | Healthy lifestyle                                                                              | NA                                                           | MARS;                                                                                                                                          | Quality classification & rating;                                                          | Researcher & developer | NR                                                       | NA         |

|                                  |                                                                                                                                                    |                                                              |                                       |                                     |                                                                                 |                                                                       |                                          |                    |                                                                                                          |             |
|----------------------------------|----------------------------------------------------------------------------------------------------------------------------------------------------|--------------------------------------------------------------|---------------------------------------|-------------------------------------|---------------------------------------------------------------------------------|-----------------------------------------------------------------------|------------------------------------------|--------------------|----------------------------------------------------------------------------------------------------------|-------------|
|                                  | potential to encourage behavior change.                                                                                                            |                                                              |                                       |                                     |                                                                                 | App Behavior Change Scale (ABACUS)                                    | Potential for behavior change            |                    |                                                                                                          |             |
| Mehdi et al. 2020<br>Germany     | To providing an overview of existing tinnitus apps.                                                                                                | Cross-sectional review of existing apps                      | NA                                    | Tinnitus                            | NA                                                                              | MARS                                                                  | Quality classification & rating          | User and developer | NR                                                                                                       | NA          |
| Mobasheri et al. 2014<br>UK      | To evaluate the evidence base and HCP involvement of apps for breast disease.                                                                      | Cross-sectional review of existing apps                      | Android, Blackberry OS, iOS & Windows | Breast disease                      | NA                                                                              | Self-developed criteria                                               | Evidence base, degree of HCP involvement | Researcher         | NR                                                                                                       | NA          |
| Naccache et al. 2021<br>France   | To explore acceptability and user experience of an app prototype for adolescents with anorexia nervosa.                                            | App development and evaluation                               | NA                                    | Adolescents with anorexia nervosa   | Individual agency; Health information seeking; Self-management                  | User Experience Questionnaire (UEQ)                                   | User experience                          | User               | Cognitive-behavioral therapy; Motivational interview strategies                                          | Development |
| Naslund et al. 2016<br>Lebanon   | To assess acceptability of a wearable device and app to support a weight loss intervention in patients with serious mental illness.                | Longitudinal user test of an app (mixed-method)              | Android & iOS                         | Serious mental illness              | Social and community support; Health tracking; Self-management                  | Adapted Usability, Satisfaction, Ease of use (USE) [33] questionnaire | Usability, satisfaction                  | User               | National Institutes of Health (NIH) Stage Model of Behavioral Therapies Research (for study design) [34] | Development |
| Negreiros et al. 2022<br>Brazil  | To identify and evaluate fitness apps that were used to increase the level of physical activity and improve the overall health of healthy adulty.  | Observational cross-sectional study to review available apps | NA                                    | Physical activity in healthy adults | NA                                                                              | MARS                                                                  | Quality classification & rating          | Researcher         | NR                                                                                                       | NA          |
| Nquyen et al. 2021<br>Canada     | To review diabetes apps' usability, features, clinical safety of insulin calculators and evaluate the quality of exportable blood glucose reports. | Observational cross-sectional study to review available apps | Android & iOS                         | Diabetes mellitus type 2            | NA                                                                              | MARS                                                                  | Quality classification & rating          | Researcher         | NR                                                                                                       | NA          |
| Nicolaidou et al. 2022<br>Cyprus | To develop and evaluate a prototype for a gamified, theory-based mobile app to enhance undergraduate students' resilience.                         | App development and evaluation                               | NA                                    | Mental health                       | Individual agency; Health information seeking                                   | SUS                                                                   | Usability                                | User               | NR                                                                                                       | NA          |
| Nolen et al. 2018<br>USA         | To develop and test an app prototype for the prevention of Early Childhood Caries.                                                                 | App development and evaluation                               | iOS                                   | Oral Health of children ≤6 years    | Individual agency; Health information-seeking; Health tracking; Self-management | Self-developed criteria                                               | Usability                                | User               | Heuristic evaluation [2]                                                                                 | Evaluation  |

|                              |                                                                                                                                                             |                                                                |                                       |                                                |                                                                                       |                                              |                                                                       |            |                  |            |
|------------------------------|-------------------------------------------------------------------------------------------------------------------------------------------------------------|----------------------------------------------------------------|---------------------------------------|------------------------------------------------|---------------------------------------------------------------------------------------|----------------------------------------------|-----------------------------------------------------------------------|------------|------------------|------------|
| O'Reilly & Laws 2019 Austria | To evaluate a pilot app in view of the app functionality and messaging.                                                                                     | Cross-sectional user test of an app (qualitative focus groups) | Android & iOS                         | Women with prior gestational diabetes mellitus | Individual agency; Social and community support; Health tracking                      | Qualitative focus groups                     | Functionality, information quality                                    | Developer  | NR               | NA         |
| Olfert et al. 2019 USA       | To examine the feasibility of a personalized nutrition tracking app.                                                                                        | Longitudinal user test of an app (mixed-method)                | Android & iOS                         | Nutrition tracking                             | Health tracking; Self-management; Link to health system                               | Unclear origin of the criteria used          | NR                                                                    | HCP        | NR               | NA         |
| Oyebode et al. 2020 Canada   | To determine factors positively and negatively affecting the effectiveness of mental health apps.                                                           | Cross-sectional review of existing apps                        | Android & iOS                         | Mental Health                                  | NA                                                                                    | Qualitative user reviews                     | Identification of factors affecting effectiveness                     | Developer  | Machine learning | Evaluation |
| Potzel et al. 2021 Germany   | To develop a theory- and evidence-based mHealth intervention to change risk behaviors in women during the first 5 years post-gestational diabetes mellitus. | App development and evaluation                                 | iOS                                   | Women after gestational diabetes mellitus      | Health information-seeking; Health tracking; Self-management                          | SUS; uMARS                                   | Usability; Engagement, functionality, aesthetics, information quality | User       | NR               | NA         |
| Quinn et al. 2019 USA        | To determine the usability of a mobile app in community-based older adults.                                                                                 | Longitudinal user test of an app (quantitative survey)         | NA                                    | Older adults (≥65 years)                       | Social and community support; Health tracking; Self-management; Link to health system | SUS; Modified MARS                           | Usability; Engagement, functionality, aesthetics                      | User       | NR               | NA         |
| Reyes et al. 2018 Canada     | To evaluate the quality of balance promoting apps and identify strengths and areas of concern.                                                              | Cross-sectional review of existing apps                        | Android & iOS                         | Balance promotion                              | NA                                                                                    | MARS                                         | Quality classification & rating                                       | Researcher | NR               | NA         |
| Ribeiro et al. 2017 Portugal | To field-test an app to promote cancer prevention behaviors.                                                                                                | Longitudinal user test of an app (mixed-method)                | Android & iOS                         | Cancer prevention behaviors                    | Individual agency; Health information-seeking; Health tracking; Self-management       | Adapted Five Usability Factors; adapted MARS | Usability, feasibility, information quality; Usefulness               | User       | NR               | NA         |
| Rivera et al. 2016 Canada    | To characterize the inclusion of evidence-based strategies, HCP involvement, and scientific evaluation of commercial apps.                                  | Cross-sectional review of existing apps                        | Android, Blackberry OS, iOS & Windows | Weight loss                                    | NA                                                                                    | Self-developed criteria                      | Evidence-based strategies, HCP involvement, scientific evaluation     | Researcher | NR               | NA         |

|                                |                                                                                                                                                           |                                                        |                              |                                                  |                                                                                 |                                                        |                                        |            |                      |            |
|--------------------------------|-----------------------------------------------------------------------------------------------------------------------------------------------------------|--------------------------------------------------------|------------------------------|--------------------------------------------------|---------------------------------------------------------------------------------|--------------------------------------------------------|----------------------------------------|------------|----------------------|------------|
| Saeedi et al. 2016 Persia      | To investigate and categorized 200 top Persian medical apps.                                                                                              | Cross-sectional review of existing apps                | Android                      | NA                                               | NA                                                                              | Unclear origin of the criteria used                    | Content analysis                       | Researcher | NR                   | NA         |
| Salmani et al. 2022 Iran       | To develop and evaluate usability of a self-management app for patients with colorectal cancer.                                                           | App development and evaluation                         | Android                      | Colorectal cancer                                | Health information-seeking; Health tracking; Self-management                    | Questionnaire for User Interaction Satisfaction (QUIS) | Usability                              | User       | NR                   | NA         |
| Sanatkar et al. 2022 Australia | To investigate use and effectiveness of an app on depressive and anxiety symptoms, work and social functioning, safety concerns, and help seeking.        | Longitudinal user test of an app (quantitative survey) | Android & iOS                | Mental health                                    | Health tracking                                                                 | Self-developed questionnaire                           | Usability, acceptability               | HCP        | NR                   | NA         |
| Sarzynski et al. 2017 USA      | To evaluate an app for accuracy of medication dosing instructions, acceptability of user interface, and patients' medication adherence.                   | App development and evaluation                         | iOS                          | Medication management                            | Individual agency; Health information-seeking; Health tracking; Self-management | SUS; Qualitative open-ended questions                  | Usability; Suggestions for improvement | User       | NR                   | NA         |
| Schmidt et al. 2020 Germany    | To monitor acceptance and usability of an app in patients with left ventricular assist device (LVAD).                                                     | Longitudinal user test of an app (quantitative survey) | Android                      | LVAD                                             | Health tracking; Link to health system                                          | Adapted app Evaluation Questionnaire                   | Acceptance, usability                  | User       | NR                   | NA         |
| Schults et al. 2019 Australia  | To outline the evidence on the development, implementation and evaluation of apps in terms of feasibility, acceptability and impact on key pain outcomes. | Scoping Review                                         | NA                           | Persistent pain (children and young adolescents) | NA                                                                              | Unclear origin of the criteria used                    | Content analysis                       | User       | NR                   | NA         |
| Scott et al. 2017 USA          | To gauge interest in app use among patients after colorectal surgery and understand factors affecting patient app use at home.                            | Longitudinal user test of an app (mixed-method)        | Android, Blackberry OS & iOS | Patients after colorectal surgery                | Health tracking; Self-management                                                | SUS                                                    | Usability                              | User       | NR                   | NA         |
| Shahmoradi et al. 2021 Iran    | To develop and evaluate a self-care app for patients with urinary tract stones.                                                                           | App development and evaluation                         | Android                      | Urinary tract stones                             | Health information-seeking; Self-management                                     | PSSUQ                                                  | Usability, satisfaction                | Expert     | Heuristic evaluation | Evaluation |

|                                   |                                                                                                                                                          |                                                                               |               |                                                    |                                                              |                                      |                                                                       |            |                                                                                          |             |
|-----------------------------------|----------------------------------------------------------------------------------------------------------------------------------------------------------|-------------------------------------------------------------------------------|---------------|----------------------------------------------------|--------------------------------------------------------------|--------------------------------------|-----------------------------------------------------------------------|------------|------------------------------------------------------------------------------------------|-------------|
| Shalan et al. 2018 UK             | To develop and evaluate a prototype to promote exercise and track changes in walking ability.                                                            | App development and evaluation                                                | Android       | Peripheral Arterial Disease                        | Individual Agency; Health tracking                           | SUS                                  | Usability                                                             | HCP        | User Centered Design [7]                                                                 | Development |
| Shen et al. 2022 China            | To develop a mobile app for technology-facilitated fluid balance monitoring and to determine its usability.                                              | App development and evaluation                                                | NA            | Fluid balance monitoring in heart failure          | Health-information-seeking; Health tracking                  | SUS                                  | Usability                                                             | User & HCP | NR                                                                                       | NA          |
| Sherwin et al. 2021 USA           | To examine usability and feasibility of a medication reminder app for irritable bowel syndrome.                                                          | Longitudinal user test of an app (mixed-method)                               | Android & iOS | Medication adherence in irritable bowel syndrome   | Self-management; Link to health system                       | USE questionnaire [33]               | Usefulness, Satisfaction, Ease of use                                 | User       | NR                                                                                       | NA          |
| Signorelli et al. 2022 USA        | To examine the potential acceptability, feasibility and usability of a mobile-based intervention to promote physical activity in breast cancer patients. | Longitudinal user test of an app (mixed-method)                               | Android       | Breat cancer                                       | Health tracking; Self-management                             | SUS; uMARS                           | Usability; Engagement, functionality, aesthetics, information quality | User       | Theoretical Framework of Acceptability (TFA)                                             | Evaluation  |
| Singh et al. 2019 USA             | To identify and evaluate apps across the spectrum of chronic kidney disease care.                                                                        | Cross-sectional review of existing apps                                       | Android & iOS | Chronic kidney disease                             | NA                                                           | Self-developed criteria              | Engagment, quality, safety, cost                                      | NR         | Framework for evaluating patient engagement, quality & safety of mobile health apps [35] | Evaluation  |
| Songtaweasin et al. 2021 Thailand | To adapt an app to improve pre-exposition prophylaxis adherence and persistence for young men who have sex with men (MSM) in Thailand.                   | Cross-sectional user test of an app (qualitative interviews and focus groups) | Android & iOS | Pre-exposition prophylaxis adherence for young MSM | Health information-seeking; Health tracking; Self-management | Self-developed questionnaire         | Suggestions for improvement                                           | User       | NR                                                                                       | NA          |
| Soomro et al. 2019 Australia      | To describe development and evaluation of the TeamDoc app regarding its design, functionality and utility.                                               | App development and evaluation                                                | Android & iOS | Cricket injury surveillance                        | Health tracking; Link to health system                       | Modified MARS user version           | Quality classification & rating                                       | User       | NR                                                                                       | NA          |
| Sudol et al. 2019 USA             | To identify and evaluate patient-centered apps in female pelvic medicine and reconstructive surgery.                                                     | Cross-sectional review of existing apps                                       | Android & iOS | Female pelvic medicine and reconstructive surgery  | NA                                                           | Modified APPLICATIONS scoring system | Content analysis                                                      | HCP        | NR                                                                                       | NA          |

|                                                  |                                                                                                                                                                                   |                                                              |                        |                               |                                                              |                                                              |                                                                  |                          |                                                                    |            |
|--------------------------------------------------|-----------------------------------------------------------------------------------------------------------------------------------------------------------------------------------|--------------------------------------------------------------|------------------------|-------------------------------|--------------------------------------------------------------|--------------------------------------------------------------|------------------------------------------------------------------|--------------------------|--------------------------------------------------------------------|------------|
| Torous et al. 2018<br>Australia, Canada, USA, UK | To provide a narrative review of various schemes toward app evaluations.                                                                                                          | Narrative review                                             | NA                     | Mental Health                 | NA                                                           | Collaborative Health App Rating Teams (CHART)                | Interoperability, usability, evidence, risk / privacy / security | User, researcher, expert | American Psychiatric Association app rating framework; ASPECT [36] | Evaluation |
| Trecca et al. 2021<br>Italy                      | To systematically review otolaryngology apps for patients in mobile app stores and the current literature.                                                                        | Observational cross-sectional study to review available apps | Android & iOS          | Otolaryngology                | NA                                                           | MARS                                                         | Quality classification & rating                                  | Researcher               | NR                                                                 | NA         |
| Vanderloo et al. 2021<br>Canada                  | To create a checklist to aid the members of a trial in searching, identifying, screening, and including selected eHealth resources for participant use in the study intervention. | Guidelines adaptation                                        | Android & iOS          | Behavior change in pediatrics | NA                                                           | MARS                                                         | Quality classification & rating                                  | Researcher               | NR                                                                 | NA         |
| Vasiloglou et al. 2020<br>Switzerland            | To examine the acceptability of <i>Nutrition &amp; Diet</i> apps, explore feature preferences and identify predictors of acceptance.                                              | Cross-sectional survey                                       | Android, iOS & Windows | Nutrition and Diet            | NA                                                           | Self-developed criteria                                      | Acceptability, reliability, functionality                        | HCP                      | NR                                                                 | NA         |
| Vasiloglou et al. 2021<br>Switzerland            | To explore the perspectives of end users on the features, current use, and acceptance of nutrition and diet mHealth apps.                                                         | Cross-sectional survey                                       | iOS, Android & Windows | Nutrition and Diet            | NA                                                           | Self-developed questionnaire                                 | Functionality, acceptability, current use                        | User                     | NR                                                                 | NA         |
| Vokinger et al. 2020<br>Switzerland              | To support critical assessment of the purposes and trustworthiness of COVID-19 apps.                                                                                              | Systematic Review                                            | NA                     | COVID-19                      | NA                                                           | COVID-19 smartphone and web applications framework checklist | Purpose, trustworthiness                                         | User & developer         | mHealth App Trustworthiness checklist [37]                         | Evaluation |
| Werner-Seidler et al. 2019<br>Australia          | To test the feasibility, acceptability and preliminary effects of an app.                                                                                                         | Longitudinal user test of an app (mixed-method)              | Android & iOS          | Sleep difficulties            | Health information-seeking; Health tracking; Self-management | Self-developed criteria                                      | Acceptability                                                    | User                     | NR                                                                 | NA         |
| Winoker et al. 2021<br>USA                       | To evaluate the quality of patient-oriented, mobile health apps available for medical management of kidney stone disease.                                                         | Observational cross-sectional study to review available apps | Android & iOS          | Kidney stone disease          | NA                                                           | MARS                                                         | Quality classification & rating                                  | Researcher               | Johns Hopkins Digital Health Scorecard [38]                        | Evaluation |



|                                   |                                                                                                                                         |                                                           |                        |                                          |                                                      |                                                                                    |                                 |                         |                                                                  |            |
|-----------------------------------|-----------------------------------------------------------------------------------------------------------------------------------------|-----------------------------------------------------------|------------------------|------------------------------------------|------------------------------------------------------|------------------------------------------------------------------------------------|---------------------------------|-------------------------|------------------------------------------------------------------|------------|
| Wyatt et al. 2015 UK              | To develop and pilot a checklist to assess medical apps.                                                                                | Checklist development, not clearly reported               | NA                     | NA                                       | NA                                                   | Royal College of Physicians Health Informatics Unit clinical app quality checklist | Structure, function, impact     | HCP                     | Donabedian's factors of medical care quality [39]                | Evaluation |
| Yasini & Marchand 2015 France     | To evaluate if usability scores correlate with medical safety.                                                                          | Cross-sectional review of existing apps                   | Android & iOS          | NA                                       | NA                                                   | Self-developed criteria                                                            | Usability, medical safety       | User, caregiver and HCP | NR                                                               | NA         |
| Yong et al. 2021 Malaysia         | To evaluate the acceptance of an app intervention to reduce child injury at home.                                                       | Longitudinal user test of an app (qualitative interviews) | Android                | Child injury at home                     | Self-diagnosis of health conditions; Self-management | Self-developed questionnaire                                                       | Acceptability                   | User                    | Consolidated Framework for Implementation Research (CFIR)        | Evaluation |
| Yu et al. 2021 USA                | To examine immigrants' acceptability for adopting a mHealth app to facilitate diabetes 2 self-management.                               | Cross-sectional user test of an app (mixed-method)        | Android                | Diabetes type 2                          | Health tracking; Self-management                     | Self-developed questionnaire                                                       | Acceptability                   | User                    | UTAUT                                                            | Evaluation |
| Zapata et al. 2014 Spain          | To analyze and assess free mobile personal health records regarding privacy and security.                                               | Systematic Review                                         | Android & iOS          | NA                                       | NA                                                   | Self-developed criteria                                                            | Privacy, security               | Developer & stakeholder | Health Insurance Portability and Accountability Act (HIPAA) [40] | Evaluation |
| Zapata et al. 2015 Spain          | To investigate usability evaluation processes described in studies on mHealth apps.                                                     | Systematic Review                                         | Android, iOS & Windows | NA                                       | NA                                                   | Quality assessment checklist                                                       | Usability                       | Researcher & developer  | ISO/IEC 9126-1 [41]<br>ISO/IEC 25010:2011 [42]                   | Evaluation |
| Zarnowiecki et al. 2020 Australia | To evaluate nutrition promotion via websites and apps for parents in view of evidence base, parent experience and commercial offerings. | Systematic Review                                         | Android & iOS          | Parents influencing children's nutrition | NA                                                   | MARS                                                                               | Quality classification & rating | Researcher              | NR                                                               | NA         |

<sup>a</sup>Abbreviations: BCW = Behavior Change Wheel; HCP = Health care professional; HON = Health On the Net; ISO = International Organization for Standardization; LVAD = left ventricular assist device; MARS = Mobile Application Rating Scale; MSM = men who have sex with men; NA = Not applicable; NR = Not reported; SUS = System Usability Scale; TAM = Technology Acceptance Model; UK = United Kingdom; USA = United States of America; USE = Usefulness, Satisfaction, Ease of use questionnaire

## References

1. Grundy QH, Wang Z, Bero LA. Challenges in assessing mobile health app quality: a systematic review of prevalent and innovative methods. *American Journal of Preventive Medicine*; 2016;51(6):1051-9.
2. Nielsen J, Molich R, editors. Heuristic evaluation of user interfaces. Proceedings of the SIGCHI conference on Human factors in computing systems; 1990.
3. Davis FD. User acceptance of information systems: the technology acceptance model (TAM). 1987.
4. Venkatesh V, Morris MG, Davis GB, Davis FD. User acceptance of information technology: Toward a unified view. *MIS quarterly*; 2003:425-78.
5. Waugaman A. From principle to practice: implementing the principles for digital development. Proceedings of the Principles for Digital Development Working Group; 2016;4.
6. Huckvale K, Car M, Morrison C, Car J. Apps for asthma self-management: a systematic assessment of content and tools. *BMC medicine*; 2012;10(1):1-11.
7. Schnall R, Mosley JP, Iribarren SJ, Bakken S, Carballo-Diéguez A, Brown III W. Comparison of a user-centered design, self-management app to existing mHealth apps for persons living with HIV. *JMIR mHealth and uHealth*; 2015;3(3):e4882.
8. Radloff LS. The CES-D scale: A self-report depression scale for research in the general population. *Applied psychological measurement*; 1977;1(3):385-401.
9. Osman A, Bagge CL, Gutierrez PM, Konick LC, Kopper BA, Barrios FX. The Suicidal Behaviors Questionnaire-Revised (SBQ-R): validation with clinical and nonclinical samples. *Assessment*; 2001;8(4):443-54.
10. International Organization for Standardization. Systems and software engineering — Life cycle processes — Requirements engineering (ISO standard no. 29148:2011) 2011 [Available from: <https://www.iso.org/standard/45171.html>].
11. Toval A, Nicolás J, Moros B, García F. Requirements reuse for improving information systems security: a practitioner's approach. *Requirements Engineering*; 2002;6(4):205-19.
12. Meyer IH. Minority stress and mental health in gay men. *Journal of health and social behavior*; 1995:38-56.
13. Ordre des conseillers et conseillères d'orientation et des psychoéducateurs et psychoéducatrices du Québec. Normes de pratique du testing en psychologie et en éducation. Montréal, Qc: Institut de recherches psychologiques; 2003.
14. Android. Up and running with material design 2016 [Available from: <https://developer.android.com/design/index.html>].
15. Apple. iOS Human Interface Guidelines 2016 [Available from: <https://developer.apple.com/design/human-interface-guidelines/ios/overview/design-principles/>].
16. Microsoft. Design & U. I. 2016 [Available from: <https://learn.microsoft.com/en-us/windows/apps/design/>].
17. Prochaska JO, DiClemente CC. Stages and processes of self-change of smoking: toward an integrative model of change. *Journal of consulting and clinical psychology*; 1983;51(3):390.
18. Venkatesh V, Thong JY, Xu X. Consumer acceptance and use of information technology: extending the unified theory of acceptance and use of technology. *MIS quarterly*; 2012:157-78.
19. Card SK, Moran TP, Newell A. The psychology of human-computer interaction. Hillside. NJ: Lawrence Erlbaum Associates; 1983.

20. Morin CM, Bootzin RR, Buysse DJ, Edinger JD, Espie CA, Lichstein KL. Psychological and behavioral treatment of insomnia: update of the recent evidence (1998–2004). *Sleep*; 2006;29(11):1398-414.
21. Gorini A, Pravettoni G. P5 medicine: a plus for a personalized approach to oncology. *Nature Reviews Clinical Oncology*; 2011;8(7):444-.
22. Bowen DJ, Kreuter M, Spring B, Cofta-Woerpel L, Linnan L, Weiner D, et al. How we design feasibility studies. *American journal of preventive medicine*; 2009;36(5):452-7.
23. Guan Z, Sun L, Xiao Q, Wang Y. Constructing an assessment framework for the quality of asthma smartphone applications. *BMC Med Inform Decis Mak*; 2019;19(1):192.
24. Jeffrey B, Bagala M, Creighton A, Leavey T, Nicholls S, Wood C, et al. Mobile phone applications and their use in the self-management of Type 2 Diabetes Mellitus: a qualitative study among app users and non-app users. *Diabetol Metab Syndr*; 2019;11:84.
25. Jin M, Kim J. Development and evaluation of an evaluation tool for healthcare smartphone applications. *Telemedicine and e-Health*; 2015;21(10):831-7.
26. Michie S, Van Stralen MM, West R. The behaviour change wheel: a new method for characterising and designing behaviour change interventions. *Implementation science*; 2011;6(1):1-12.
27. Pettifor J, McCarron M, Schoepp G, Stark C, Stewart D. CANADIAN PSYCHOLOGICAL ASSOCIATION. 2000.
28. Torous JB, Chan SR, Gipson SYT, Kim JW, Nguyen TQ, Luo J, et al. A Hierarchical Framework for Evaluation and Informed Decision Making Regarding Smartphone Apps for Clinical Care. *Psychiatr Serv*; 2018;69(5):498-500.
29. Slaughter L, Harper B, Norman K, editors. Assessing the equivalence of the paper and on-line formats of the QUIS 5.5. *Proceedings of Mid Atlantic Human Factors Conference*; 1994.
30. Bandura A. Health promotion by social cognitive means. *Health education & behavior*; 2004;31(2):143-64.
31. Karagianni K. Optimizing the UX Honeycomb—A Small Amendment to the Classic Diagram Hopefully Improves Its UX. *UX Collective*; 2021.
32. Michie S, Richardson M, Johnston M, Abraham C, Francis J, Hardeman W, et al. The behavior change technique taxonomy (v1) of 93 hierarchically clustered techniques: building an international consensus for the reporting of behavior change interventions. *Annals of behavioral medicine*; 2013;46(1):81-95.
33. Gao M, Kortum P, Oswald F, editors. Psychometric evaluation of the use (usefulness, satisfaction, and ease of use) questionnaire for reliability and validity. *Proceedings of the human factors and ergonomics society annual meeting*; 2018: SAGE Publications Sage CA: Los Angeles, CA.
34. Onken LS, Carroll KM, Shoham V, Cuthbert BN, Riddle M. Reenvisioning clinical science: unifying the discipline to improve the public health. *Clinical Psychological Science*; 2014;2(1):22-34.
35. Singh K, Diamantidis CJ, Ramani S, Bhavsar NA, Mara P, Warner J, et al. Patients' and Nephrologists' Evaluation of Patient-Facing Smartphone Apps for CKD. *Clin J Am Soc Nephrol*; 2019;14(4):523-9.
36. Torous JB, Chan SR, Yellowlees PM, Boland R. To use or not? Evaluating ASPECTS of smartphone apps and mobile technology for clinical care in psychiatry. *The Journal of clinical psychiatry*; 2016;77(6):6729.
37. van Haasteren A, Gille F, Fadda M, Vayena E. Development of the mHealth App Trustworthiness checklist. *Digital health*; 2019;5:2055207619886463.
38. Mathews SC, McShea MJ, Hanley CL, Ravitz A, Labrique AB, Cohen AB. Digital health: a path to validation. *NPJ digital medicine*; 2019;2(1):1-9.

39. Donabedian A. The Quality of Medical Care: Methods for assessing and monitoring the quality of care for research and for quality assurance programs. *Science*; 1978;200(4344):856-64.
40. Anderson DR. Health and Human Services Standards for Privacy of Individually Identifiable Health Information. *US Att'ys Bull*; 2002;50:16.
41. International Organization for Standardization. Software engineering — Product quality — Part 1: Quality model (ISO standard no. 9126-1:2001) 2001 [Available from: <https://www.iso.org/standard/22749.html>].
42. International Organization for Standardization. Systems and software engineering — Systems and software Quality Requirements and Evaluation (SQuaRE) — System and software quality models (ISO standard no. 25010:2011) 2011 [Available from: <https://www.iso.org/standard/35733.html>].
