# Supplementary material for: Developing a Comprehensive List of Criteria to Evaluate the Characteristics and Quality of eHealth Smartphone Apps: Systematic Review
Source: PubMed Central journal article supplement (PMC10825776; doi:10.2196/48625), 2024-01-15
Supplement: mhealth_v12i1e48625_app4.pdf [file mhealth_v12i1e48625_app4.pdf]

This is a Multimedia Appendix to a full manuscript published in the J Med Internet Res. For full copyright and citation information see <http://dx.doi.org/10.2196/48625>

## Characteristics of studies included

Table A4. Detailed characteristics of studies included in the review

|                         |                                                                                        | <b>N (%)</b> |
|-------------------------|----------------------------------------------------------------------------------------|--------------|
| <b>Location</b>         |                                                                                        |              |
|                         | USA                                                                                    | 32 (25.0%)   |
|                         | Australia                                                                              | 16 (12.5%)   |
|                         | UK                                                                                     | 11 (8.6%)    |
|                         | Canada                                                                                 | 10 (7.8%)    |
|                         | Spain                                                                                  | 8 (6.3%)     |
|                         | China                                                                                  | 5 (3.9%)     |
|                         | Germany                                                                                | 5 (3.9%)     |
|                         | Switzerland                                                                            | 4 (3.1%)     |
|                         | Iran                                                                                   | 3 (2.3%)     |
|                         | Africa                                                                                 | 2 (1.6%)     |
|                         | Multiple countries                                                                     | 7 (5.5%)     |
| <b>Design</b>           |                                                                                        |              |
|                         | Cross-sectional review of existing apps                                                | 42 (32.8%)   |
|                         | Reports on various app development and evaluation approaches                           | 29 (22.7%)   |
|                         | Quantitative, qualitative cross-sectional or longitudinal user testing of a single app | 27 (21.1%)   |
|                         | Literature reviews                                                                     |              |
|                         | - Systematic review                                                                    | 7 (5.5%)     |
|                         | - Scoping review                                                                       | 5 (3.9%)     |
|                         | - Review combined with Delphi survey                                                   | 2 (1.6%)     |
|                         | - Narrative review                                                                     | 1 (0.8%)     |
|                         | Systematic checklist development (i.e., based on literature review and expert input)   | 3 (2.3%)     |
|                         | Cross-sectional survey                                                                 | 3 (2.3%)     |
|                         | Qualitative interview                                                                  | 2 (1.6%)     |
|                         | Mixed-methods approach                                                                 | 2 (1.6%)     |
|                         | Randomized controlled trial                                                            | 1 (0.8%)     |
|                         | Not clearly reported                                                                   | 4 (3.1%)     |
| <b>Operating system</b> |                                                                                        |              |
|                         | Android                                                                                | 21 (16.4%)   |
|                         | iOS                                                                                    | 11 (8.6%)    |
|                         | WeChat                                                                                 | 1 (0.8%)     |
|                         | iOS & Android                                                                          | 50 (39.1%)   |
|                         | Other combinations                                                                     | 17 (13.3%)   |
|                         | No focus on any specific operating system                                              | 28 (21.9%)   |
| <b>Topic/condition</b>  |                                                                                        |              |
|                         | Mental health                                                                          | 23 (18.0%)   |
|                         | No specific focus / >1 indication                                                      | 19 (14.8%)   |
|                         | Health promotion, e.g., nutrition, weight loss, sleep                                  | 17 (13.3%)   |
|                         | Heart diseases & conditions                                                            | 7 (5.5%)     |
|                         | Gynecology, pregnancy and postpartum period                                            | 7 (5.5%)     |
|                         | Oncology                                                                               | 6 (4.7%)     |
|                         | Parenting/family health                                                                | 6 (4.7%)     |
|                         | Diabetes                                                                               | 5 (3.9%)     |
|                         | Medication adherence/management                                                        | 5 (3.9%)     |
|                         | Nephrology                                                                             | 4 (3.1%)     |
|                         | Support of caregivers                                                                  | 4 (3.1%)     |
|                         | Support of HCP, e.g., postoperative care, management of lab data                       | 4 (3.1%)     |

|                                                 |                                                              |            |
|-------------------------------------------------|--------------------------------------------------------------|------------|
|                                                 | Unspecified chronic diseases                                 | 3 (2.3%)   |
|                                                 | Balance and fall prevention                                  | 3 (2.3%)   |
|                                                 | Neurological issues in childhood & adolescence               | 3 (2.3%)   |
|                                                 | Covid-19                                                     | 2 (1.6%)   |
|                                                 | Dermatology                                                  | 2 (1.6%)   |
|                                                 | Orthopaedic                                                  | 2 (1.6%)   |
|                                                 | Asthma                                                       | 1 (0.8%)   |
|                                                 | Accidental injuries                                          | 1 (0.8%)   |
|                                                 | Allergy                                                      | 1 (0.8%)   |
|                                                 | Brain injury                                                 | 1 (0.8%)   |
|                                                 | Otolaryngology                                               | 1 (0.8%)   |
|                                                 | Tinnitus                                                     | 1 (0.8%)   |
| <b>Main purpose of intervention<sup>a</sup></b> |                                                              |            |
|                                                 | Personal health tracking                                     | 41 (32.0%) |
|                                                 | Health information-seeking                                   | 31 (24.2%) |
|                                                 | Self-management of health                                    | 29 (22.7%) |
|                                                 | Individuals' linkage to their health systems                 | 17 (13.3%) |
|                                                 | Individual agency                                            | 9 (7.0%)   |
|                                                 | Social and community support                                 | 6 (4.7%)   |
|                                                 | Self-diagnosis of health conditions                          | 6 (4.7%)   |
| <b>Evaluation tools</b>                         |                                                              |            |
|                                                 | Mobile App Rating Scale (MARS)                               | 33 (25.8%) |
|                                                 | Investigator-developed criteria                              | 30 (23.4%) |
|                                                 | System Usability Scale (SUS)                                 | 22 (17.2%) |
|                                                 | Adapted versions of MARS                                     | 8 (6.3%)   |
|                                                 | System Usability Questionnaire                               | 2 (1.6%)   |
|                                                 | Questionnaire for User Interaction Satisfaction (QUIS)       | 2 (1.6%)   |
|                                                 | Quality of Experience (QoE) survey                           | 2 (1.6%)   |
| <b>Focus of the tool</b>                        |                                                              |            |
|                                                 | Usability                                                    | 65 (45.8%) |
|                                                 | Quality classification and ratings in general                | 37 (26.1%) |
|                                                 | Functionality                                                | 18 (12.7%) |
|                                                 | Acceptability/feasibility (often not clearly differentiated) | 17 (12.0%) |
|                                                 | Information quality                                          | 14 (9.9%)  |
|                                                 | Underlying/supporting theories/evidence                      | 12 (8.5%)  |
|                                                 | Usefulness                                                   | 12 (8.5%)  |
|                                                 | Satisfaction                                                 | 10 (7.0%)  |
|                                                 | Engagement                                                   | 9 (6.3%)   |
|                                                 | Technical matters (e.g., infrastructure/ interoperability)   | 9 (6.3%)   |
|                                                 | Security/privacy                                             | 7 (4.9%)   |
|                                                 | Design/aesthetics                                            | 7 (4.9%)   |
|                                                 | User experience                                              | 7 (4.9%)   |
|                                                 | Content analysis                                             | 7 (4.9%)   |
|                                                 | Clinician/academic involvement                               | 5 (3.5%)   |
|                                                 | Intention to use                                             | 4 (2.8%)   |
|                                                 | Validity/reliability or behavior change                      | 4 (2.8%)   |
| <b>Target tool users</b>                        |                                                              |            |
|                                                 | End users (e.g., patients or caregivers)                     | 44 (34.4%) |
|                                                 | Researchers                                                  | 34 (26.6%) |
|                                                 | HCPs                                                         | 15 (11.7%) |
|                                                 | Software developers                                          | 7 (5.5%)   |
|                                                 | Experts (not specified)                                      | 2 (1.6%)   |
|                                                 | Certification company                                        | 1 (0.8%)   |
|                                                 | >1 stakeholder group                                         | 22 (17.1%) |
|                                                 | unclear                                                      | 3 (2.3%)   |

| <b>Theoretical frameworks</b> |                                                                              |            |
|-------------------------------|------------------------------------------------------------------------------|------------|
|                               | No clear theoretical underpinning reported                                   | 83 (64.8%) |
|                               | Various non-eHealth-specific behavioral/social/implementation theories       | 10 (16.9%) |
|                               | Technology Acceptance Model (TAM)                                            | 7 (11.9%)  |
|                               | Heuristic evaluation                                                         | 5 (8.5%)   |
|                               | Models of the International Organization for Standardization (ISO)           | 3 (5.1%)   |
|                               | (extended) Unified Theory of Acceptance and Use of Technology (UTAUT/UTAUT2) | 3 (5.1%)   |
|                               | User Centered Design                                                         | 2 (3.4%)   |

*<sup>a</sup>Classified according to the World Health Organization's classification for self-care interventions for health and well-being [4]. Only 65 studies (50.8%) provided enough detail to classify them.*
